# Supplementary material for: Single Cell Transcriptomics of Ependymal Cells Across Age, Region and Species Reveals Cilia-Related and Metal Ion Regulatory Roles as Major Conserved Ependymal Cell Functions
Source: Front Cell Neurosci. 2021 Jul 15;15:703951. doi: 10.3389/fncel.2021.703951 (PMC8319996; doi:10.3389/fncel.2021.703951)
Supplement: Supplementary file 1 [file Table_1.XLSX]

## Sheet: Genes up in neonatal mouse
	Gene	P-val	"avg_log2FC"	"pct.1"	"pct.2"	P-val adj
1	1700001C02Rik	0	0.431995	0.463	0.001	0
2	1700009P17Rik	0	0.746926	0.732	0.006	0
3	1700016K19Rik	0	0.373631	0.415	0.002	0
4	1700026D08Rik	0	0.288325	0.366	0.001	0
5	4833427G06Rik	0	0.252802	0.366	0	0
6	Calml4	0	0.520071	0.463	0.003	0
7	Ccdc108	0	0.327547	0.341	0	0
8	Ccdc19	0	0.521153	0.561	0.003	0
9	Ccdc67	0	0.588807	0.39	0.001	0
10	Lrrc23	0	0.90172	0.561	0.005	0
11	Lrrc71	0	0.30955	0.366	0.001	0
12	Morn5	0	0.475246	0.463	0.001	0
13	Odf3b	0	0.70426	0.488	0.002	0
14	Pifo	0	0.684362	0.732	0.005	0
15	Rsph1	0	1.09674	0.634	0.006	0
16	Wdr63	0	0.41371	0.415	0.001	0
17	Folr1	2.32969e-303	0.69236	0.463	0.003	4.27661e-299
18	Ccdc153	2.6211e-303	0.8485	0.39	0.002	4.81155e-299
19	1700012B09Rik	2.42101e-299	0.518744	0.366	0.001	4.44426e-295
20	Ccdc113	1.28213e-296	0.447229	0.488	0.004	2.35361e-292
21	Ccdc146	1.53252e-287	0.34733	0.366	0.002	2.81324e-283
22	Meig1	5.48782e-282	0.744118	0.512	0.005	1.0074e-277
23	Fam183b	2.17371e-281	0.711452	0.512	0.005	3.99027e-277
24	1700003M02Rik	2.41234e-279	0.347203	0.439	0.003	4.42834e-275
25	Wdr96	9.7087e-267	0.29507	0.463	0.004	1.78223e-262
26	Ppp1r32	5.25096e-266	0.307229	0.366	0.002	9.63919e-262
27	Spef2	1.8558e-260	0.383981	0.463	0.004	3.40669e-256
28	Dynlrb2	1.622e-256	1.35998	0.732	0.014	2.9775e-252
29	Tmem212	4.50308e-256	0.526085	0.293	0.001	8.2663e-252
30	Mcidas	1.30446e-246	0.274254	0.244	0	2.3946e-242
31	Ak7	1.21558e-244	0.49496	0.488	0.005	2.23144e-240
32	Dmkn	2.67489e-242	0.253783	0.293	0.001	4.91029e-238
33	Zmynd10	1.73486e-229	0.423512	0.439	0.004	3.18468e-225
34	Aebp1	3.07745e-225	0.386573	0.512	0.007	5.64928e-221
35	Gm16006	6.7442e-224	0.272154	0.366	0.003	1.23803e-219
36	Fam216b	4.762e-223	0.284048	0.341	0.002	8.7416e-219
37	1700007K13Rik	1.8432e-218	0.35361	0.439	0.005	3.38357e-214
38	3300002A11Rik	1.62118e-213	0.369292	0.244	0.001	2.97601e-209
39	Iqcg	9.97774e-206	0.48511	0.61	0.012	1.83161e-201
40	Lrrc51	7.57715e-204	0.359157	0.415	0.005	1.39094e-199
41	Capsl	1.7652e-203	0.302073	0.415	0.005	3.24038e-199
42	Kcne2	4.50912e-200	0.323619	0.293	0.002	8.27739e-196
43	Hdc	7.61073e-195	0.360227	0.341	0.003	1.3971e-190
44	E030010N08Rik	5.18188e-184	0.26857	0.268	0.002	9.51238e-180
45	Foxj1	1.30987e-181	1.0191	0.634	0.015	2.40452e-177
46	Tekt4	1.43564e-175	0.271772	0.268	0.002	2.6354e-171
47	Rsph4a	3.47669e-170	0.364713	0.366	0.004	6.38215e-166
48	6820408C15Rik	2.33631e-162	0.347185	0.39	0.006	4.28876e-158
49	Ak9	4.68774e-161	0.315082	0.268	0.002	8.60529e-157
50	Nme5	2.59702e-160	0.444445	0.659	0.019	4.76735e-156
51	Tm4sf1	1.09627e-157	0.473757	0.488	0.01	2.01242e-153
52	Lrrc48	1.18787e-157	0.380528	0.439	0.008	2.18058e-153
53	Dcdc2a	2.62018e-155	0.250786	0.39	0.006	4.80986e-151
54	Fbxo36	8.6913e-150	0.328091	0.415	0.007	1.59546e-145
55	1500015O10Rik	2.05167e-149	1.52868	0.707	0.025	3.76625e-145
56	1700003E16Rik	2.96168e-148	0.293749	0.341	0.005	5.43676e-144
57	1110017D15Rik	1.1927e-143	0.672038	0.585	0.017	2.18944e-139
58	Lrrc46	2.12671e-141	0.277658	0.341	0.005	3.90401e-137
59	Wfikkn2	2.5009e-141	0.338026	0.317	0.004	4.5909e-137
60	Ccno	4.26512e-139	0.365202	0.244	0.002	7.82948e-135
61	Enkur	1.47537e-137	0.809417	0.659	0.024	2.70833e-133
62	Ubxn11	1.98123e-130	0.415464	0.561	0.017	3.63694e-126
63	Pltp	3.71295e-127	0.776212	0.683	0.028	6.81587e-123
64	Ccna1	1.77293e-120	0.316219	0.268	0.003	3.25457e-116
65	Rarres2	7.23166e-116	0.535328	0.463	0.013	1.32752e-111
66	Mia	1.71036e-115	0.486165	0.39	0.009	3.13971e-111
67	Wdr52	6.14028e-115	0.357374	0.415	0.01	1.12717e-110
68	Crip3	1.47594e-112	0.394714	0.22	0.002	2.70939e-108
69	Mlf1	2.63809e-111	0.420954	0.488	0.015	4.84275e-107
70	Gm973	1.09797e-110	0.478023	0.537	0.019	2.01555e-106
71	Wdr66	6.64158e-109	0.351292	0.39	0.01	1.21919e-104
72	Fam161a	3.68261e-106	0.265394	0.415	0.011	6.76017e-102
73	Gsta4	2.94499e-105	0.442628	0.634	0.029	5.40612e-101
74	Spa17	3.41905e-104	0.564139	0.537	0.021	6.27635e-100
75	Lrriq1	7.35413e-104	0.339533	0.415	0.012	1.35e-99
76	Spag6	2.88128e-102	0.371916	0.463	0.015	5.28917e-98
77	1700088E04Rik	7.71664e-102	0.329977	0.537	0.021	1.41654e-97
78	Cox6b2	6.8729e-98	0.258689	0.415	0.012	1.26166e-93
79	Spag8	2.92095e-93	0.260848	0.317	0.007	5.36198e-89
80	Sostdc1	3.67583e-91	0.515842	0.366	0.01	6.74772e-87
81	Hspa2	1.31172e-82	0.268915	0.39	0.013	2.40792e-78
82	Stk33	4.13593e-80	0.27514	0.366	0.012	7.59233e-76
83	Tppp3	9.94977e-79	0.793236	0.561	0.031	1.82648e-74
84	Gm5918	7.85741e-77	0.317806	0.463	0.021	1.44238e-72
85	Chchd10	9.769e-76	1.25381	0.78	0.068	1.7933e-71
86	Ccdc114	5.33678e-71	0.307572	0.366	0.014	9.79673e-67
87	Ildr2	1.62383e-69	0.481353	0.561	0.035	2.98086e-65
88	Tmem107	1.36876e-68	0.872025	0.683	0.055	2.51262e-64
89	Mns1	3.15384e-68	0.470442	0.512	0.03	5.78951e-64
90	1700094D03Rik	6.82742e-67	0.873162	0.585	0.041	1.25331e-62
91	Pcp4l1	2.16094e-66	0.524094	0.415	0.02	3.96684e-62
92	Riiad1	2.81175e-61	0.727907	0.561	0.041	5.16152e-57
93	A330021E22Rik	3.99412e-61	0.283953	0.439	0.024	7.33201e-57
94	Fxyd1	8.00795e-55	0.423809	0.463	0.03	1.47002e-50
95	Spata24	4.83562e-52	0.41278	0.439	0.029	8.87674e-48
96	Bphl	1.1436e-50	0.444582	0.634	0.063	2.0993e-46
97	Clu	5.34368e-50	1.14073	0.854	0.124	9.8094e-46
98	Ccdc40	3.1834e-47	0.261255	0.317	0.016	5.84376e-43
99	Anxa2	2.98069e-46	0.334971	0.488	0.039	5.47165e-42
100	Pla2g16	3.51747e-46	0.337377	0.366	0.022	6.45703e-42
101	Sulf1	8.47941e-46	0.261904	0.195	0.006	1.55656e-41
102	Anxa5	1.20774e-44	0.271711	0.512	0.044	2.21704e-40
103	Ccdc39	3.51923e-44	0.440572	0.585	0.061	6.46024e-40
104	Naaa	4.15315e-43	0.369643	0.512	0.045	7.62393e-39
105	Ccdc173	2.67961e-40	0.266727	0.39	0.029	4.91896e-36
106	Trpm3	3.63679e-39	0.455593	0.293	0.017	6.67605e-35
107	Fam154b	4.26929e-39	0.268221	0.366	0.026	7.83714e-35
108	Cep128	4.70194e-38	0.252995	0.341	0.023	8.63135e-34
109	Gm5617	3.51847e-37	0.378644	0.415	0.036	6.45885e-33
110	Pttg1	4.08666e-33	0.388963	0.537	0.066	7.50189e-29
111	Naga	2.5211e-32	0.270568	0.463	0.05	4.62798e-28
112	Ccdc74a	2.22766e-30	0.254113	0.244	0.015	4.08931e-26
113	Serpinh1	2.434e-30	0.404756	0.61	0.091	4.46809e-26
114	Mt2	3.42162e-29	1.65989	0.805	0.187	6.28106e-25
115	Spint2	2.37042e-28	0.368361	0.488	0.064	4.35138e-24
116	Mt3	9.05159e-28	0.727801	0.756	0.151	1.6616e-23
117	Tubb4b	5.20328e-27	0.970767	0.78	0.208	9.55167e-23
118	Spef1	1.12022e-26	0.386836	0.537	0.081	2.0564e-22
119	Cetn2	6.18634e-26	0.417026	0.659	0.125	1.13563e-21
120	Mdm1	1.14118e-25	0.350737	0.39	0.046	2.09487e-21
121	B9d1	3.72376e-25	0.276037	0.439	0.057	6.83571e-21
122	Dnajc15	2.79892e-24	0.358325	0.537	0.089	5.13798e-20
123	Sparc	3.04243e-24	0.856981	0.805	0.19	5.58498e-20
124	Pbxip1	9.70675e-24	0.396354	0.439	0.061	1.78187e-19
125	Ptgds	2.13865e-23	0.404266	0.366	0.045	3.92591e-19
126	Cdkn1a	2.49216e-23	0.581875	0.415	0.056	4.57485e-19
127	1110032A03Rik	3.84053e-23	0.433955	0.61	0.121	7.05006e-19
128	1110004E09Rik	1.01795e-22	0.484011	0.634	0.137	1.86865e-18
129	Mt1	2.69382e-22	2.00796	0.854	0.279	4.94505e-18
130	Dpcd	4.01225e-22	0.367611	0.537	0.098	7.36528e-18
131	Tubb2b	4.05671e-21	-1.44146	0.293	0.912	7.44691e-17
132	Hspa4l	6.34062e-21	0.552853	0.512	0.094	1.16395e-16
133	Rsph9	9.9919e-21	0.39272	0.561	0.113	1.83421e-16
134	Tmem47	1.62529e-20	0.403202	0.463	0.078	2.98354e-16
135	2610015P09Rik	1.6708e-20	0.277857	0.317	0.038	3.06709e-16
136	Enpp2	2.39764e-20	0.632836	0.366	0.051	4.40134e-16
137	Tubb5	8.34828e-20	-1.59012	0.585	0.951	1.53249e-15
138	Marcksl1	1.05065e-19	-1.15461	0.463	0.931	1.92867e-15
139	Sox9	1.14231e-19	0.515706	0.683	0.158	2.09694e-15
140	Acyp1	1.33096e-19	0.268069	0.488	0.086	2.44324e-15
141	Hipk1	1.3659e-19	0.321543	0.415	0.067	2.50738e-15
142	Igfbp2	1.98343e-19	1.46144	0.756	0.262	3.64098e-15
143	Ezr	2.85453e-19	0.640379	0.732	0.2	5.24007e-15
144	Igf2	3.50186e-19	0.366866	0.293	0.034	6.42836e-15
145	Tmsb4x	3.7897e-19	-1.49342	0.854	0.989	6.95675e-15
146	Vim	1.01096e-18	0.772992	0.854	0.251	1.85582e-14
147	Etfa	2.32193e-18	0.424975	0.634	0.158	4.26238e-14
148	Metrn	3.5799e-18	0.283093	0.39	0.061	6.57162e-14
149	Tctex1d2	5.90339e-18	0.326716	0.415	0.072	1.08369e-13
150	Zfp36l1	6.43904e-18	0.405254	0.537	0.111	1.18201e-13
151	Rtn1	1.68522e-17	-1.13589	0.61	0.936	3.09356e-13
152	Ttll3	1.71489e-17	0.264719	0.293	0.037	3.14803e-13
153	Dpysl3	3.25663e-17	-1.0396	0.268	0.829	5.97819e-13
154	Ift43	1.03012e-16	0.341848	0.439	0.086	1.89098e-12
155	Cib1	1.18561e-16	0.256839	0.366	0.059	2.17642e-12
156	Apoe	1.44813e-16	1.02327	0.902	0.395	2.65834e-12
157	Tuba1a	1.52274e-16	-1.47154	0.902	0.992	2.7953e-12
158	Sox4	3.60526e-16	-1.17741	0.415	0.857	6.61817e-12
159	Hn1	7.86679e-16	-0.923287	0.244	0.82	1.44411e-11
160	Tubb3	1.11755e-15	-1.29739	0.39	0.834	2.05149e-11
161	Car2	1.33522e-15	0.264456	0.317	0.048	2.45106e-11
162	Ankrd54	3.11089e-15	0.28377	0.415	0.08	5.71066e-11
163	Col9a3	3.92298e-15	0.482218	0.439	0.095	7.20141e-11
164	Elof1	3.4371e-14	0.776339	0.659	0.235	6.30948e-10
165	Crmp1	4.02326e-14	-0.842327	0.171	0.742	7.3855e-10
166	Acot1	6.4527e-14	0.376169	0.659	0.194	1.18452e-09
167	Gria2	8.7132e-14	-1.0162	0.146	0.73	1.59948e-09
168	Ednrb	8.90885e-14	0.359141	0.585	0.149	1.6354e-09
169	Dnajc3	1.20886e-13	0.385772	0.561	0.153	2.21911e-09
170	Ttc3	1.52193e-13	-0.90432	0.634	0.931	2.79381e-09
171	Aldoa	2.02173e-13	0.4261	0.756	0.293	3.71129e-09
172	Nsg1	3.70612e-13	-0.784152	0.171	0.718	6.80332e-09
173	Stmn3	3.99856e-13	-0.797216	0.268	0.783	7.34015e-09
174	Basp1	6.08501e-13	-0.901654	0.366	0.817	1.11702e-08
175	Rabl5	6.22202e-13	0.471476	0.439	0.113	1.14218e-08
176	Ramp1	6.38271e-13	0.256132	0.366	0.071	1.17167e-08
177	Nsg2	7.43981e-13	-0.860591	0.317	0.789	1.36573e-08
178	Dcx	8.05002e-13	-0.780784	0.146	0.717	1.47774e-08
179	Mapt	1.55517e-12	-0.91556	0.244	0.749	2.85482e-08
180	Fnbp1l	1.91033e-12	-0.855844	0.366	0.798	3.5068e-08
181	Ift74	2.47325e-12	0.34091	0.561	0.167	4.54015e-08
182	Ccdc41	3.08346e-12	0.336039	0.512	0.143	5.66031e-08
183	Ccdc104	3.29526e-12	0.769629	0.756	0.346	6.0491e-08
184	Mlc1	3.40596e-12	0.392166	0.415	0.098	6.25232e-08
185	Atrx	3.66196e-12	-0.756482	0.561	0.846	6.72226e-08
186	Myl12a	4.59646e-12	0.266126	0.537	0.148	8.43773e-08
187	Stmn1	6.4132e-12	-0.576992	0.024	0.612	1.17727e-07
188	Hist1h2bc	6.56074e-12	0.447271	0.415	0.097	1.20435e-07
189	Tcf4	7.88007e-12	-1.04203	0.488	0.829	1.44654e-07
190	Nek1	8.48716e-12	0.380117	0.439	0.119	1.55799e-07
191	Fam173a	9.81271e-12	0.317208	0.537	0.16	1.80132e-07
192	Stmn2	1.06883e-11	-1.04394	0.39	0.789	1.96205e-07
193	Fxyd6	1.21342e-11	-0.619759	0.098	0.641	2.22747e-07
194	Rps5	1.28962e-11	-0.726309	0.927	0.976	2.36735e-07
195	Hsp90ab1	1.49136e-11	-0.684003	0.976	0.991	2.73769e-07
196	Nnat	1.53103e-11	-1.13591	0.585	0.911	2.8105e-07
197	Cyr61	1.57043e-11	0.297676	0.366	0.077	2.88283e-07
198	Tmsb10	1.8321e-11	-0.764647	0.366	0.798	3.36319e-07
199	Nrep	2.12787e-11	-0.952818	0.634	0.838	3.90613e-07
200	Mllt11	2.55804e-11	-0.703697	0.146	0.69	4.69579e-07

## Sheet: Genes up in adult mouse 
	Gene	P-val	"avg_log2FC"	"pct.1"	"pct.2"	P-val adj
1	1700016K19Rik	1.41969e-241	1.00859	0.958	0.018	2.16631e-237
2	Odf3b	4.2624e-231	0.669141	0.908	0.014	6.504e-227
3	Gm867	5.41848e-228	0.641854	0.845	0.006	8.26806e-224
4	1700007K13Rik	4.69329e-218	0.847872	0.901	0.02	7.16149e-214
5	Tm4sf1	9.49615e-209	1.16421	0.979	0.045	1.44902e-204
6	Enkur	9.24965e-206	0.671443	0.873	0.022	1.4114e-201
7	Tmem212	1.573e-201	1.30476	0.979	0.055	2.40024e-197
8	Dnah12	7.53158e-201	0.556101	0.775	0.008	1.14924e-196
9	Cfap126	1.02484e-200	0.903391	0.915	0.036	1.5638e-196
10	1700012B09Rik	5.23302e-200	0.795506	0.908	0.033	7.98507e-196
11	Cfap161	1.73119e-192	0.466369	0.746	0.008	2.64162e-188
12	Fam183b	1.13489e-191	1.25216	0.979	0.063	1.73172e-187
13	Mia	1.92684e-191	1.16983	0.915	0.044	2.94016e-187
14	Lrrc51	2.23915e-188	0.594006	0.873	0.032	3.41671e-184
15	Tctex1d4	2.37504e-188	0.512744	0.796	0.017	3.62407e-184
16	Rsph1	3.69002e-188	1.15559	0.958	0.059	5.6306e-184
17	1700001C02Rik	5.25125e-188	0.626776	0.81	0.02	8.01288e-184
18	Dynlrb2	1.84816e-186	1.18715	0.958	0.062	2.82011e-182
19	Nme5	2.5032e-185	0.468781	0.775	0.015	3.81964e-181
20	Gm10714	1.2942e-183	0.470672	0.739	0.011	1.97481e-179
21	Meig1	5.34114e-183	1.11771	0.944	0.061	8.15005e-179
22	Pifo	1.37103e-182	0.539869	0.789	0.02	2.09205e-178
23	Ccdc153	1.88319e-181	1.88841	0.993	0.086	2.87355e-177
24	1110017D15Rik	1.52155e-180	1.36005	0.965	0.072	2.32174e-176
25	Fam166b	4.91506e-180	0.435075	0.697	0.007	7.49989e-176
26	Foxj1	1.4597e-179	0.510483	0.775	0.018	2.22736e-175
27	Iqca	2.09052e-175	0.391389	0.704	0.01	3.18992e-171
28	1700088E04Rik	2.27466e-173	0.560113	0.831	0.032	3.4709e-169
29	Cetn4	1.86099e-170	0.533887	0.796	0.029	2.83969e-166
30	Capsl	3.06601e-170	0.443294	0.704	0.013	4.67842e-166
31	Hdc	2.11578e-169	0.583548	0.831	0.035	3.22847e-165
32	Calml4	2.17332e-169	0.541729	0.725	0.017	3.31627e-165
33	Cdhr4	3.5586e-168	0.426486	0.655	0.007	5.43007e-164
34	Dmkn	5.60745e-167	0.376644	0.683	0.01	8.5564e-163
35	Sntn	5.56062e-166	0.618174	0.761	0.025	8.48495e-162
36	Fam216b	1.44085e-162	0.321587	0.613	0.003	2.19859e-158
37	2410004P03Rik	1.50115e-162	0.4093	0.697	0.015	2.29061e-158
38	Fhad1	6.29515e-162	0.424629	0.669	0.011	9.60577e-158
39	Aebp1	8.84733e-162	0.541443	0.775	0.03	1.35001e-157
40	Crygn	4.48245e-161	0.594794	0.739	0.023	6.83978e-157
41	Tppp3	7.01331e-161	1.36434	0.993	0.11	1.07016e-156
42	Ifitm3	1.14473e-158	0.76664	0.81	0.039	1.74674e-154
43	Tmem107	2.807e-158	0.73777	0.901	0.067	4.2832e-154
44	Spa17	4.19708e-158	0.55929	0.831	0.047	6.40433e-154
45	Mlf1	8.89179e-158	0.490377	0.754	0.029	1.3568e-153
46	Pltp	5.13999e-157	0.877261	0.894	0.063	7.84311e-153
47	Dnali1	1.00878e-156	0.385355	0.655	0.012	1.53929e-152
48	Efcab1	1.87607e-156	0.374051	0.655	0.012	2.8627e-152
49	Ascc1	5.28598e-153	0.915343	0.908	0.08	8.06587e-149
50	Spef2	4.83121e-152	0.336636	0.648	0.013	7.37194e-148
51	1700019G24Rik	1.40592e-151	0.331331	0.634	0.011	2.14529e-147
52	1500015O10Rik	1.78008e-151	0.892627	0.831	0.053	2.71622e-147
53	Efcab10	1.50873e-150	0.56587	0.761	0.036	2.30217e-146
54	Sncg	1.05918e-149	0.650593	0.725	0.029	1.6162e-145
55	Tekt1	1.4917e-149	0.406363	0.662	0.017	2.27618e-145
56	Spint2	1.80312e-149	0.334123	0.627	0.011	2.75138e-145
57	1700007G11Rik	2.26294e-149	0.315454	0.577	0.005	3.45301e-145
58	Pcp4l1	4.39659e-149	0.602842	0.746	0.031	6.70876e-145
59	Cfap77	5.90989e-149	0.335532	0.606	0.008	9.01791e-145
60	Riiad1	7.21946e-149	0.842378	0.908	0.084	1.10162e-144
61	1700024G13Rik	5.51741e-148	0.310585	0.57	0.004	8.41902e-144
62	Ccdc33	1.22984e-147	0.339743	0.613	0.01	1.87661e-143
63	Cfap45	3.75563e-147	0.313852	0.606	0.009	5.73071e-143
64	Clec3b	9.0926e-147	0.379798	0.577	0.006	1.38744e-142
65	1700001L19Rik	6.82585e-146	0.354075	0.606	0.01	1.04156e-141
66	Ccdc146	1.29817e-145	0.375201	0.662	0.018	1.98088e-141
67	Hist1h4h	7.66303e-145	0.982418	0.873	0.077	1.1693e-140
68	Ccdc113	3.05475e-143	0.338429	0.606	0.011	4.66125e-139
69	Nuf2	3.2826e-143	0.616045	0.838	0.061	5.00893e-139
70	Gas6	1.6083e-142	0.680367	0.852	0.066	2.45411e-138
71	Dnah6	6.96631e-142	0.281429	0.57	0.007	1.06299e-137
72	S100a11	9.58829e-142	0.737507	0.873	0.076	1.46308e-137
73	Lrrc23	2.017e-139	0.311053	0.606	0.013	3.07775e-135
74	Acta2	1.94463e-138	0.521203	0.641	0.02	2.96732e-134
75	Anxa2	2.30935e-138	0.521762	0.732	0.038	3.52383e-134
76	Anxa11	2.30821e-136	0.353009	0.592	0.013	3.5221e-132
77	Hspa2	1.92562e-135	0.702522	0.923	0.096	2.9383e-131
78	Morn5	2.18663e-135	0.366086	0.613	0.017	3.33658e-131
79	Rarres2	3.27112e-135	2.11704	0.986	0.173	4.99141e-131
80	Rsph4a	8.01659e-135	0.313668	0.556	0.008	1.22325e-130
81	Kif9	9.33155e-135	0.276558	0.577	0.011	1.4239e-130
82	Akap14	1.15446e-133	0.255321	0.528	0.005	1.76159e-129
83	Ccdc108	1.38499e-133	0.266479	0.514	0.003	2.11336e-129
84	Iqcg	9.65165e-132	0.302667	0.563	0.011	1.47274e-127
85	Spag17	1.14062e-131	0.274295	0.535	0.007	1.74047e-127
86	Cfap44	4.53814e-131	0.267198	0.556	0.01	6.92475e-127
87	Got1l1	7.73439e-131	0.310684	0.549	0.009	1.18019e-126
88	Lbp	1.55902e-130	0.29162	0.549	0.009	2.37891e-126
89	Cfap54	1.1641e-129	0.322152	0.549	0.01	1.77629e-125
90	Tekt4	1.23367e-129	0.259278	0.514	0.005	1.88245e-125
91	Ak7	4.46004e-126	0.321149	0.549	0.012	6.80558e-122
92	Anxa5	4.52927e-126	0.692939	0.901	0.107	6.91122e-122
93	Gm11992	6.11842e-126	0.253643	0.479	0.003	9.33609e-122
94	Dnaja4	3.97703e-123	0.275061	0.528	0.01	6.06855e-119
95	Ttll3	5.40035e-123	0.436707	0.69	0.04	8.24039e-119
96	Bphl	1.04186e-122	0.574761	0.817	0.079	1.58978e-118
97	Lgals3	1.71746e-121	0.290383	0.535	0.012	2.62068e-117
98	St3gal6	2.53977e-120	0.312908	0.606	0.023	3.87544e-116
99	Mns1	7.9235e-120	0.401818	0.676	0.042	1.20905e-115
100	Calb1	3.58115e-119	0.307049	0.493	0.008	5.46448e-115
101	Cdhr3	1.81154e-118	0.270516	0.5	0.008	2.76422e-114
102	Wdr66	2.30305e-118	0.304196	0.521	0.012	3.51422e-114
103	1700040L02Rik	2.28282e-117	0.292295	0.507	0.01	3.48335e-113
104	Ppp1r36	3.19081e-117	0.28412	0.528	0.013	4.86886e-113
105	Cfap100	2.912e-116	0.311058	0.592	0.023	4.44341e-112
106	Hipk1	1.73968e-115	0.452686	0.739	0.059	2.65458e-111
107	Gm17455	7.01029e-115	0.294802	0.493	0.009	1.0697e-110
108	Crip1	3.77323e-114	0.733785	0.859	0.101	5.75758e-110
109	Dpcd	1.3928e-113	0.455794	0.824	0.084	2.12528e-109
110	4933434E20Rik	5.34342e-113	1.38451	0.979	0.237	8.15353e-109
111	Cetn2	1.45839e-112	0.79764	0.937	0.158	2.22535e-108
112	Rsph9	7.22439e-111	0.353569	0.704	0.05	1.10237e-106
113	Ucma	1.221e-110	0.371834	0.458	0.007	1.86313e-106
114	Med9os	1.28868e-110	0.299644	0.528	0.017	1.9664e-106
115	Ccpg1os	1.19169e-108	0.355048	0.641	0.041	1.8184e-104
116	Gm21149	2.40531e-108	0.328408	0.43	0.004	3.67027e-104
117	1700026L06Rik	5.2352e-108	0.27132	0.5	0.014	7.98839e-104
118	Gm12326	1.07317e-107	0.306299	0.521	0.018	1.63756e-103
119	Spata24	1.9577e-107	0.307503	0.592	0.03	2.98726e-103
120	Gm973	1.20902e-106	0.398229	0.662	0.048	1.84484e-102
121	Gm5617	1.23447e-106	0.445332	0.718	0.065	1.88368e-102
122	Wwc1	5.49729e-106	0.348956	0.62	0.038	8.38832e-102
123	Prelp	1.63452e-105	0.415417	0.704	0.059	2.49412e-101
124	Ppil6	3.91681e-105	0.28121	0.613	0.035	5.97666e-101
125	Spag6l	3.96131e-105	0.259729	0.493	0.014	6.04456e-101
126	Pvalb	4.17073e-105	0.293284	0.465	0.01	6.36411e-101
127	Baiap2	6.62157e-105	0.260225	0.514	0.018	1.01039e-100
128	Hsph1	8.14752e-105	0.529051	0.81	0.099	1.24323e-100
129	Chchd10	5.50169e-104	2.05997	0.993	0.331	8.39503e-100
130	Dgat2	7.55165e-102	0.264859	0.486	0.015	1.15231e-97
131	Spef1	5.73003e-101	0.321484	0.57	0.032	8.74346e-97
132	Elof1	3.5107e-100	1.06332	0.965	0.266	5.35698e-96
133	B9d1	1.04543e-97	0.364271	0.669	0.06	1.59522e-93
134	Atp1a1	1.33355e-91	0.348599	0.676	0.066	2.03487e-87
135	Fhl1	1.73553e-91	0.350918	0.662	0.064	2.64824e-87
136	Hspa4l	2.51244e-91	0.501647	0.768	0.105	3.83373e-87
137	Tagln2	3.7202e-90	0.299256	0.585	0.042	5.67665e-86
138	Tubb4b	4.82618e-88	1.24773	0.951	0.309	7.36426e-84
139	Zfp36l1	3.76687e-87	0.613025	0.859	0.152	5.74786e-83
140	Pttg1	5.06216e-85	0.429299	0.775	0.111	7.72436e-81
141	Dbi	1.6044e-84	2.96353	1	0.77	2.44816e-80
142	Endog	1.47797e-82	0.300112	0.62	0.06	2.25524e-78
143	Gsn	9.09018e-82	0.561449	0.697	0.094	1.38707e-77
144	Syne1	3.04039e-81	0.493183	0.746	0.11	4.63933e-77
145	Mt3	5.42955e-79	2.36641	1	0.693	8.28495e-75
146	Gng5	1.74163e-78	1.10271	0.965	0.422	2.65756e-74
147	Mettl7a1	1.77854e-78	0.262027	0.549	0.046	2.71388e-74
148	Mro	2.21697e-77	0.285233	0.648	0.073	3.38288e-73
149	Hist1h4i	6.25374e-77	0.359911	0.62	0.074	9.54259e-73
150	Hsp90aa1	7.99989e-75	1.62053	0.993	0.802	1.2207e-70
151	Plekhb1	1.37501e-74	0.361933	0.662	0.089	2.09812e-70
152	Nudt4	2.98189e-74	0.646328	0.908	0.25	4.55006e-70
153	Txnip	4.88438e-74	0.367629	0.613	0.073	7.45308e-70
154	Dnajb2	1.03079e-73	0.383577	0.711	0.104	1.57288e-69
155	Slc2a1	1.24762e-72	0.307738	0.613	0.07	1.90375e-68
156	Aqp4	1.40509e-71	0.491795	0.81	0.143	2.14403e-67
157	S100b	3.30133e-71	0.821463	0.951	0.293	5.0375e-67
158	Dnajc3	6.61005e-70	0.33504	0.69	0.106	1.00863e-65
159	Nudc	2.07211e-69	0.837296	0.944	0.407	3.16184e-65
160	Slc38a1	2.31927e-69	0.567759	0.838	0.202	3.53898e-65
161	Ift22	1.62769e-68	0.310334	0.669	0.102	2.48369e-64
162	Ift43	2.38289e-68	0.375479	0.754	0.135	3.63606e-64
163	Fth1	2.56925e-68	1.21448	1	0.913	3.92042e-64
164	Tspan15	2.61369e-67	0.285781	0.613	0.08	3.98823e-63
165	Mt1	5.57198e-67	2.06142	1	0.811	8.50228e-63
166	mt-Co1	1.05491e-64	1.26095	0.993	0.995	1.60968e-60
167	1110004E09Rik	9.22785e-64	0.262548	0.542	0.064	1.40808e-59
168	Hist1h2bc	3.32431e-63	0.652707	0.951	0.314	5.07257e-59
169	Mt2	6.60654e-63	1.43618	1	0.534	1.00809e-58
170	Dynll1	7.78108e-63	0.963873	0.993	0.676	1.18731e-58
171	Chchd6	1.70726e-62	0.293298	0.676	0.113	2.60511e-58
172	Itm2c	1.84354e-62	0.833486	0.908	0.324	2.81305e-58
173	Ramp1	7.20892e-62	0.571795	0.873	0.232	1.10001e-57
174	Sparc	1.34207e-61	0.49858	0.746	0.143	2.04786e-57
175	Aig1	4.39966e-61	0.267558	0.634	0.094	6.71344e-57
176	Ssbp4	1.05195e-59	0.299342	0.62	0.096	1.60516e-55
177	1810043H04Rik	1.25466e-59	0.338117	0.754	0.158	1.91449e-55
178	Dalrd3	1.94607e-59	0.311497	0.669	0.117	2.96951e-55
179	Tubb2b	2.93914e-59	-1.63828	0.169	0.858	4.48483e-55
180	mt-Nd4	3.25471e-59	1.01385	0.986	0.963	4.96636e-55
181	Fxyd1	3.28677e-58	0.529573	0.873	0.232	5.01528e-54
182	Pbxip1	4.89923e-57	0.340116	0.711	0.132	7.47574e-53
183	Sox9	5.23662e-57	0.530185	0.831	0.229	7.99057e-53
184	Dnajc15	1.10523e-56	0.320803	0.711	0.143	1.68647e-52
185	Rbp1	4.35158e-56	0.255621	0.563	0.08	6.64008e-52
186	Hspe1	3.5349e-55	0.815266	0.951	0.487	5.39391e-51
187	S100a6	3.93374e-55	0.629949	0.725	0.164	6.00249e-51
188	Gm14964	6.15436e-55	0.512072	0.782	0.203	9.39094e-51
189	mt-Co3	7.46693e-55	0.860389	1	0.998	1.13938e-50
190	1110032A03Rik	1.1036e-54	0.372366	0.704	0.149	1.68398e-50
191	Btg1	2.58389e-54	-1.34827	0.246	0.848	3.94276e-50
192	Chchd2	7.29493e-54	0.837957	0.979	0.793	1.11313e-49
193	Gstm1	1.03128e-53	0.723377	0.979	0.356	1.57362e-49
194	Serpinh1	1.0381e-53	0.262689	0.599	0.1	1.58404e-49
195	Stmn1	2.62775e-52	-2.04022	0.528	0.901	4.00969e-48
196	Gpx4	1.12913e-51	0.677639	0.951	0.509	1.72294e-47
197	mt-Atp6	1.83531e-51	0.858984	1	1	2.8005e-47
198	Vim	2.87305e-51	0.511442	0.796	0.222	4.38399e-47
199	Tomm7	2.94716e-51	0.699733	0.951	0.618	4.49708e-47
200	Usp2	2.42087e-50	0.256087	0.507	0.076	3.69401e-46

## Sheet: Genes up in adult human
	Gene	P-val	"avg_log2FC"	"pct.1"	"pct.2"	P-val adj
1	FAM183A	0	2.00644	0.848	0.01	0
2	TCTEX1D1	0	0.993525	0.697	0.004	0
3	PIFO	0	1.7925	0.939	0.013	0
4	CFAP126	0	1.23541	0.667	0.003	0
5	C5orf49	0	1.15565	0.727	0.006	0
6	CAPSL	0	1.35852	0.727	0.004	0
7	FAM81B	0	0.626852	0.424	0.001	0
8	MORN5	0	1.13632	0.636	0.005	0
9	BBOX1	0	0.904502	0.545	0.003	0
10	C11orf88	0	1.45253	0.758	0.007	0
11	CFAP52	0	0.679697	0.515	0.002	0
12	SPEF1	0	0.950012	0.545	0.003	0
13	TEX26	0	0.654572	0.424	0.001	0
14	IGFBP7-AS1	1.09058e-307	0.970618	0.606	0.004	1.81854e-303
15	DYDC2	9.37567e-307	1.23072	0.667	0.006	1.56339e-302
16	MAOB	2.54649e-300	1.11788	0.606	0.005	4.24627e-296
17	RP11-356K23.1	1.25949e-292	2.04218	0.879	0.013	2.1002e-288
18	FANK1	7.72693e-291	0.624496	0.455	0.002	1.28847e-286
19	C1orf194	1.77918e-290	2.28267	0.879	0.013	2.96678e-286
20	DYNLRB2	1.91822e-286	1.57838	0.848	0.012	3.19864e-282
21	RSPH1	5.7366e-283	1.47951	0.727	0.009	9.56578e-279
22	C9orf116	6.6629e-281	1.34916	0.758	0.01	1.11104e-276
23	CD24	2.73496e-280	1.284	0.667	0.007	4.56055e-276
24	TEKT1	4.53331e-264	0.679991	0.424	0.002	7.5593e-260
25	CCDC74B	3.92403e-259	0.568547	0.364	0.001	6.54331e-255
26	CCDC153	9.00675e-243	0.78026	0.545	0.005	1.50188e-238
27	CFAP73	1.99704e-242	0.945612	0.576	0.006	3.33007e-238
28	C4orf22	9.95648e-232	0.509015	0.303	0.001	1.66024e-227
29	ANKRD66	1.6031e-231	0.413563	0.303	0.001	2.67317e-227
30	ZMYND10	1.36182e-229	1.08951	0.667	0.009	2.27083e-225
31	DAW1	2.061e-229	0.806818	0.485	0.004	3.43671e-225
32	LRRIQ1	3.50856e-226	0.679109	0.424	0.003	5.85052e-222
33	C9orf24	7.19014e-224	2.38064	0.909	0.021	1.19896e-219
34	RP11-128M1.1	1.00551e-221	0.652805	0.364	0.002	1.67669e-217
35	ROPN1L	1.04253e-221	0.877228	0.515	0.005	1.73842e-217
36	C2orf40	1.35149e-220	0.904502	0.455	0.004	2.25361e-216
37	FAM216B	2.55476e-218	0.595633	0.394	0.002	4.26006e-214
38	C11orf97	9.99277e-216	0.412385	0.303	0.001	1.66629e-211
39	MGST1	1.82241e-212	1.507	0.636	0.009	3.03887e-208
40	GABRG1	1.03382e-211	0.679697	0.364	0.002	1.7239e-207
41	CFAP77	3.1018e-202	0.412385	0.303	0.001	5.17225e-198
42	IQCA1	3.76633e-202	0.413858	0.273	0.001	6.28035e-198
43	SPA17	2.06054e-201	0.830307	0.485	0.005	3.43595e-197
44	NME5	1.73913e-198	0.986495	0.606	0.009	2.9e-194
45	C11orf70	2.9974e-197	0.942978	0.576	0.008	4.99816e-193
46	LINC01088	1.25578e-195	0.728437	0.455	0.004	2.09401e-191
47	FOXJ1	9.35034e-191	1.00848	0.576	0.009	1.55917e-186
48	FAM166B	5.08556e-190	0.828255	0.515	0.007	8.48017e-186
49	CFAP53	1.26426e-187	0.82972	0.485	0.006	2.10815e-183
50	IL13RA2	7.21761e-186	0.505777	0.364	0.003	1.20354e-181
51	TMEM47	4.42418e-184	1.02635	0.606	0.01	7.37733e-180
52	EFCAB1	1.59633e-183	0.900101	0.485	0.006	2.66188e-179
53	TMEM232	7.22937e-178	0.506954	0.333	0.002	1.2055e-173
54	AMBP	4.03544e-177	0.312568	0.212	0	6.7291e-173
55	CDS1	9.64058e-176	0.564722	0.394	0.004	1.60757e-171
56	NTS	1.89126e-175	0.676464	0.394	0.004	3.15368e-171
57	RP11-295M3.4	5.7385e-175	0.379807	0.273	0.001	9.56894e-171
58	IRX3	5.7385e-175	0.379807	0.273	0.001	9.56894e-171
59	CALY	3.30592e-173	0.44628	0.242	0.001	5.51263e-169
60	PPP1R1B	3.9022e-172	0.56531	0.364	0.003	6.50692e-168
61	TUSC3	1.15915e-171	0.47328	0.364	0.003	1.93288e-167
62	DNAH9	9.98533e-171	0.676464	0.424	0.005	1.66505e-166
63	C15orf65	4.48055e-170	0.536739	0.333	0.002	7.47131e-166
64	CFAP157	5.46288e-168	0.700499	0.455	0.006	9.10936e-164
65	BAIAP3	5.17163e-160	0.593575	0.364	0.003	8.62369e-156
66	FAM74A6	1.02236e-159	0.346155	0.242	0.001	1.70478e-155
67	EFCAB10	1.12204e-159	0.311389	0.242	0.001	1.871e-155
68	CCDC33	1.12204e-159	0.311389	0.242	0.001	1.871e-155
69	CCDC170	2.76315e-156	0.536151	0.333	0.003	4.60755e-152
70	SPAG8	4.17712e-155	1.00381	0.576	0.011	6.96535e-151
71	PIH1D3	2.33235e-154	0.47681	0.273	0.002	3.88919e-150
72	EFHC2	5.94076e-154	0.536739	0.303	0.002	9.90622e-150
73	DYX1C1	4.42962e-150	0.588297	0.455	0.007	7.3864e-146
74	ZBBX	1.25357e-146	0.276944	0.182	0	2.09033e-142
75	TUBA4B	7.64745e-145	0.346744	0.212	0.001	1.27521e-140
76	STOML3	8.9206e-145	0.276355	0.212	0.001	1.48751e-140
77	C7orf57	1.60732e-144	0.564428	0.333	0.003	2.68021e-140
78	SLC47A2	4.35751e-143	0.674997	0.394	0.005	7.26615e-139
79	SPAG6	1.32103e-140	0.959509	0.545	0.011	2.20281e-136
80	KITLG	7.11617e-138	0.37863	0.273	0.002	1.18662e-133
81	TRIL	1.06273e-137	0.344094	0.273	0.002	1.7721e-133
82	NNAT	1.13897e-137	1.7379	0.788	0.027	1.89923e-133
83	TCTEX1D2	1.66847e-135	0.896478	0.727	0.023	2.78218e-131
84	DNALI1	2.19815e-134	0.774114	0.485	0.009	3.66541e-130
85	MT1F	2.45013e-134	1.15205	0.636	0.017	4.08559e-130
86	FRMPD2	1.34296e-132	0.275765	0.212	0.001	2.23939e-128
87	AKAP14	1.34324e-132	0.34586	0.212	0.001	2.23985e-128
88	SLC39A12	1.49344e-132	0.345565	0.212	0.001	2.49031e-128
89	CCDC78	3.21587e-131	0.726093	0.424	0.007	5.36247e-127
90	RP4-666F24.3	2.48679e-130	0.312273	0.182	0.001	4.14671e-126
91	SLC14A1	3.68956e-130	0.806525	0.333	0.004	6.15234e-126
92	PPP1R42	9.41815e-130	0.444807	0.242	0.002	1.57048e-125
93	RP11-263K19.4	1.19913e-129	0.345565	0.242	0.002	1.99955e-125
94	CAPS	1.58871e-129	3.2043	1	0.053	2.64917e-125
95	C2orf73	1.72393e-129	0.310211	0.242	0.002	2.87466e-125
96	PPIL6	1.53313e-128	0.532626	0.364	0.005	2.55649e-124
97	ANXA1	1.8102e-128	2.86917	1	0.052	3.01851e-124
98	SPATA18	1.12806e-124	0.378335	0.273	0.002	1.88104e-120
99	CRIP1	3.53884e-124	1.23735	0.636	0.019	5.90102e-120
100	WDR78	4.2353e-124	0.535269	0.303	0.003	7.06237e-120
101	BMPR1B	4.75487e-124	0.442453	0.303	0.003	7.92875e-120
102	MYLK3	5.72426e-124	0.410032	0.303	0.003	9.5452e-120
103	ODF3B	6.07073e-124	1.12492	0.727	0.026	1.01229e-119
104	PIH1D2	1.77635e-122	0.380102	0.212	0.001	2.96207e-118
105	MAPK15	1.99116e-122	0.34586	0.212	0.001	3.32026e-118
106	C6orf118	2.71317e-122	0.275176	0.212	0.001	4.52421e-118
107	ARMC3	5.11857e-122	0.676758	0.333	0.004	8.53521e-118
108	FABP7	1.76966e-118	0.970512	0.545	0.014	2.95091e-114
109	B9D1	6.13188e-118	0.669437	0.455	0.009	1.02249e-113
110	CCDC39	1.12136e-116	0.276944	0.152	0	1.86988e-112
111	FOLR1	3.32382e-115	0.411796	0.242	0.002	5.54247e-111
112	CCDC65	3.41345e-115	0.378924	0.242	0.002	5.69192e-111
113	MNS1	8.49029e-112	0.586249	0.424	0.009	1.41576e-107
114	GMPR	2.70976e-110	0.87167	0.424	0.009	4.51853e-106
115	TTC25	4.38755e-109	0.37863	0.242	0.002	7.31623e-105
116	FHL1	3.19361e-108	1.27509	0.758	0.033	5.32534e-104
117	CTXN1	4.67503e-108	0.532919	0.333	0.005	7.79562e-104
118	DPCD	7.07201e-108	0.740135	0.515	0.014	1.17926e-103
119	PPP1R32	8.51171e-108	0.501373	0.333	0.005	1.41933e-103
120	DIAPH3	1.63951e-106	0.275765	0.182	0.001	2.73389e-102
121	CSRP2	1.82842e-105	0.990762	0.576	0.018	3.04889e-101
122	IQCG	2.15479e-104	0.878869	0.606	0.021	3.59311e-100
123	KCNJ16	2.03509e-103	0.309328	0.242	0.002	3.39351e-99
124	ID4	1.70152e-101	1.02509	0.606	0.021	2.83728e-97
125	NEBL	2.54451e-100	0.43981	0.303	0.004	4.24298e-96
126	ZNF487	1.48132e-99	0.470932	0.333	0.006	2.4701e-95
127	WDR86	2.36214e-99	0.310506	0.212	0.002	3.93888e-95
128	HSPB8	2.55663e-99	0.689992	0.455	0.012	4.26319e-95
129	C22orf15	2.84274e-99	0.309917	0.212	0.002	4.74026e-95
130	DNAAF3	1.09869e-97	0.346155	0.182	0.001	1.83207e-93
131	CCNA1	1.39946e-97	0.3108	0.182	0.001	2.33359e-93
132	PPM1J	1.59477e-96	0.375396	0.273	0.004	2.65928e-92
133	FAM92B	3.13014e-93	0.472106	0.273	0.004	5.21951e-89
134	SPATA17	9.34982e-91	0.311684	0.152	0.001	1.55908e-86
135	CETN2	1.61982e-90	1.76093	0.879	0.058	2.70105e-86
136	DNAH12	3.42622e-90	0.379807	0.182	0.001	5.71322e-86
137	DMKN	4.52836e-90	0.275176	0.182	0.001	7.55105e-86
138	EFEMP1	6.85602e-87	0.670898	0.364	0.008	1.14324e-82
139	AK7	5.84086e-86	0.307858	0.242	0.003	9.73964e-82
140	PALMD	7.43358e-86	0.306389	0.242	0.003	1.23955e-81
141	NUP62CL	1.83404e-83	0.273704	0.212	0.002	3.05827e-79
142	2021-03-10	1.9825e-83	0.27341	0.212	0.002	3.30581e-79
143	DDAH1	5.66641e-82	0.40475	0.303	0.006	9.44873e-78
144	FBXO2	7.0035e-81	0.889019	0.606	0.028	1.16783e-76
145	MORN2	1.00463e-80	0.752376	0.576	0.025	1.67523e-76
146	AQP4	1.5714e-80	0.556226	0.333	0.008	2.62031e-76
147	TSPAN6	3.68167e-80	0.611315	0.394	0.011	6.13918e-76
148	C8orf34	4.65175e-80	0.469467	0.303	0.006	7.75679e-76
149	EMX2	7.55047e-79	0.407095	0.273	0.005	1.25904e-74
150	CRNDE	1.26781e-78	0.403579	0.333	0.008	2.11408e-74
151	RARRES2	3.67214e-78	1.11672	0.667	0.036	6.1233e-74
152	RSPH9	5.02741e-78	0.309917	0.182	0.002	8.3832e-74
153	KLHDC9	1.80915e-76	0.374222	0.273	0.005	3.01675e-72
154	SGMS2	1.81916e-75	0.27341	0.212	0.003	3.03344e-71
155	C4orf47	3.06579e-74	0.436586	0.303	0.007	5.11221e-70
156	CDHR4	3.1497e-74	0.311389	0.152	0.001	5.25212e-70
157	SPAG1	3.70084e-74	0.339981	0.273	0.005	6.17115e-70
158	CFAP43	3.70706e-73	0.309917	0.182	0.002	6.18152e-69
159	EXPH5	4.99896e-72	0.339394	0.273	0.006	8.33576e-68
160	BZRAP1-AS1	8.23347e-69	0.274293	0.182	0.002	1.37293e-64
161	WDR38	9.15875e-69	0.344094	0.182	0.002	1.52722e-64
162	VIM	1.18709e-66	1.70603	0.879	0.078	1.97948e-62
163	ENKUR	7.11256e-66	0.27194	0.212	0.003	1.18602e-61
164	DRC1	1.06841e-65	0.27606	0.121	0.001	1.78157e-61
165	GJA1	3.86965e-65	0.811943	0.364	0.012	6.45265e-61
166	PGAM2	6.52839e-65	0.27341	0.182	0.002	1.08861e-60
167	CP	3.74723e-64	0.305216	0.242	0.005	6.24851e-60
168	DNAJC25	5.47562e-64	0.62974	0.424	0.017	9.1306e-60
169	CCDC114	2.85563e-63	0.307271	0.212	0.004	4.76176e-59
170	DRC3	3.51934e-63	0.491439	0.364	0.012	5.8685e-59
171	AK1	9.6821e-62	2.7885	0.97	0.12	1.61449e-57
172	CCDC146	2.85535e-61	0.434831	0.303	0.009	4.76129e-57
173	S100A10	6.05691e-60	1.28487	0.727	0.057	1.00999e-55
174	PNMA2	1.11515e-58	0.339688	0.242	0.006	1.85952e-54
175	FBXO15	7.21578e-57	0.30375	0.242	0.006	1.20323e-52
176	RP11-620J15.3	5.76025e-56	0.767433	0.515	0.029	9.60522e-52
177	C17orf97	3.13057e-55	0.428703	0.333	0.012	5.22023e-51
178	DNAAF1	2.01723e-54	0.748067	0.424	0.02	3.36372e-50
179	ECM2	3.98581e-53	0.343211	0.182	0.003	6.64635e-49
180	TSNAXIP1	5.35352e-53	0.307271	0.182	0.003	8.927e-49
181	BBOF1	8.00216e-53	0.435416	0.273	0.008	1.33436e-48
182	OSCP1	2.74619e-51	0.372169	0.242	0.007	4.57927e-47
183	ENTPD2	5.98623e-51	0.27341	0.152	0.002	9.98203e-47
184	FBLN1	9.39798e-50	0.327713	0.242	0.007	1.56711e-45
185	MT1X	7.68707e-49	2.20435	0.879	0.115	1.28182e-44
186	MFI2-AS1	1.06858e-48	0.371291	0.242	0.007	1.78186e-44
187	AKR1C3	1.37991e-48	0.27194	0.182	0.004	2.30099e-44
188	SYBU	1.50997e-48	0.271353	0.182	0.004	2.51788e-44
189	ANXA2	3.18063e-48	1.08995	0.636	0.054	5.3037e-44
190	MT1G	3.7194e-48	0.771438	0.424	0.023	6.2021e-44
191	C20orf96	4.01771e-48	0.511369	0.394	0.02	6.69954e-44
192	TSTD1	1.00047e-47	0.656362	0.515	0.034	1.66828e-43
193	MT1E	1.04832e-47	0.934991	0.636	0.053	1.74807e-43
194	MLF1	5.24324e-47	1.29789	0.758	0.081	8.7431e-43
195	CD36	2.14079e-46	0.518323	0.303	0.012	3.56978e-42
196	GPR162	3.48218e-46	0.363406	0.303	0.012	5.80654e-42
197	EPHX2	7.4313e-46	0.367489	0.273	0.01	1.23917e-41
198	EFHC1	8.87066e-46	0.794382	0.455	0.028	1.47918e-41
199	NR2F1	1.67427e-45	0.394245	0.303	0.012	2.79184e-41
200	TUBB2B	1.9615e-45	1.10785	0.727	0.073	3.2708e-41

## Sheet: Genes up in mouse spinal cord
	Gene	P-val	"avg_log2FC"	"pct.1"	"pct.2"	P-val adj
1	1700028P14Rik	0	0.364472	0.352	0.001	0
2	AC157761.1	0	0.387533	0.419	0	0
3	AC159092.1	0	1.75471	0.852	0.002	0
4	AC167245.5	0	0.677078	0.619	0.035	0
5	Acot5	0	0.484808	0.43	0	0
6	Aebp1	0	0.52345	0.491	0.008	0
7	AL669896.1	0	0.551384	0.512	0.001	0
8	Ascc1	0	0.927374	0.747	0.052	0
9	Atf3	0	1.26239	0.547	0.048	0
10	Bbox1	0	0.255792	0.291	0.011	0
11	C1qtnf3	0	0.310064	0.305	0.001	0
12	Calml4	0	0.712918	0.602	0.003	0
13	Capsl	0	0.588246	0.561	0.001	0
14	Catip	0	0.312954	0.299	0.004	0
15	Ccdc113	0	0.315148	0.32	0.001	0
16	Ccdc153	0	0.634883	0.494	0.001	0
17	Ccdc33	0	0.320018	0.314	0	0
18	Ccdc74a	0	0.449649	0.456	0.016	0
19	Ccpg1os	0	0.440058	0.497	0.045	0
20	Cd24a	0	1.0435	0.773	0.03	0
21	Cetn4	0	0.305108	0.34	0.009	0
22	Cfap126	0	1.05166	0.756	0.001	0
23	Cfap161	0	0.370227	0.401	0.001	0
24	Cfap52	0	0.334309	0.349	0.001	0
25	Cfap77	0	0.379377	0.401	0.001	0
26	Chchd10	0	1.88118	0.98	0.191	0
27	Chek2	0	0.336861	0.355	0.013	0
28	Clec3b	0	0.507938	0.395	0.004	0
29	Crygn	0	0.515808	0.442	0.002	0
30	Dmkn	0	0.599548	0.555	0.001	0
31	Dnah12	0	0.414939	0.41	0.001	0
32	Dnali1	0	0.321645	0.328	0.001	0
33	Drc3	0	0.295687	0.32	0.002	0
34	Dusp14	0	0.304424	0.331	0.011	0
35	Dydc2	0	0.271661	0.302	0.004	0
36	Dynlrb2	0	1.30018	0.858	0.003	0
37	Efcab1	0	0.289888	0.334	0.004	0
38	Enkur	0	0.618015	0.578	0.002	0
39	Ezr	0	0.321741	0.375	0.014	0
40	Fam166b	0	0.626739	0.558	0.003	0
41	Fam183b	0	1.63276	0.907	0.005	0
42	Fam216b	0	0.411639	0.422	0.001	0
43	Fhl1	0	0.979945	0.779	0.092	0
44	Folr1	0	0.291836	0.256	0	0
45	Fos	0	2.63751	0.898	0.166	0
46	Foxj1	0	0.713133	0.663	0.027	0
47	Hdc	0	0.341527	0.358	0.001	0
48	Hspa2	0	0.732767	0.654	0.059	0
49	Id4	0	0.523142	0.517	0.041	0
50	Ifitm3	0	2.18662	0.977	0.149	0
51	Ifitm6	0	0.389402	0.267	0.001	0
52	Iqca	0	0.408245	0.328	0	0
53	Iqcg	0	0.421092	0.439	0.006	0
54	Lrrc51	0	0.780256	0.68	0.031	0
55	Mapk15	0	0.301763	0.334	0.001	0
56	Meig1	0	0.535651	0.494	0.005	0
57	Mia	0	0.412771	0.366	0.004	0
58	Mlf1	0	1.08904	0.785	0.008	0
59	Mns1	0	0.365205	0.392	0.01	0
60	Morn5	0	0.336794	0.36	0.002	0
61	Mt3	0	2.26255	0.971	0.213	0
62	Nkx6-1	0	0.326642	0.343	0.006	0
63	Nmb	0	0.28218	0.305	0.013	0
64	Nme5	0	0.675275	0.608	0.008	0
65	Nme9	0	0.411481	0.416	0.001	0
66	Nnat	0	1.74175	0.872	0.053	0
67	Nr4a3	0	0.263653	0.282	0.003	0
68	Nuf2	0	0.622095	0.535	0.002	0
69	Odf3b	0	0.656059	0.584	0.008	0
70	Oscp1	0	0.32148	0.358	0.021	0
71	Pcp4	0	0.786531	0.549	0.036	0
72	Pdlim4	0	0.469065	0.485	0.036	0
73	Pifo	0	0.608954	0.59	0	0
74	Ppp1r32	0	0.275649	0.308	0.001	0
75	Ppp1r36	0	0.604314	0.538	0.001	0
76	Prelp	0	0.257888	0.302	0.005	0
77	Riiad1	0	1.00909	0.73	0.006	0
78	RP23-100C7.3	0	1.57376	0.869	0.008	0
79	RP23-127O4.1	0	0.333941	0.366	0	0
80	RP23-156N21.2	0	0.761219	0.645	0.001	0
81	RP23-161B11.4	0	0.538156	0.512	0.002	0
82	RP23-167L1.8	0	0.36924	0.337	0.002	0
83	RP23-207H18.3	0	0.300466	0.366	0.022	0
84	RP23-20K21.1	0	0.338471	0.375	0.002	0
85	RP23-281F13.4	0	0.327783	0.346	0	0
86	RP23-321K1.1	0	0.387349	0.413	0	0
87	RP23-340G24.4	0	0.941156	0.744	0.003	0
88	RP23-353J21.2	0	0.359536	0.363	0.002	0
89	RP23-430H1.2	0	1.27786	0.82	0.007	0
90	RP23-81N4.4	0	0.723307	0.602	0.003	0
91	RP23-96I9.2	0	0.861493	0.706	0.002	0
92	RP24-132L16.12	0	0.353411	0.352	0.001	0
93	RP24-147G7.1	0	0.251172	0.314	0.004	0
94	RP24-160I20.1	0	1.01467	0.744	0.026	0
95	RP24-314J18.1	0	0.314664	0.355	0	0
96	RP24-472I15.1	0	0.451862	0.459	0.001	0
97	RP24-84D8.8	0	0.339178	0.372	0	0
98	RP24-85H21.6	0	0.418067	0.401	0.01	0
99	Rsph1	0	1.81923	0.939	0.007	0
100	Rsph4a	0	0.271554	0.288	0.001	0
101	Rsph9	0	0.307279	0.323	0.017	0
102	Slc14a1	0	0.304914	0.363	0.019	0
103	Slc26a3	0	0.334272	0.346	0.001	0
104	Smkr-ps	0	0.323581	0.352	0.001	0
105	Socs3	0	0.846509	0.515	0.047	0
106	Spa17	0	0.39001	0.416	0.014	0
107	Spag6	0	0.393984	0.395	0.002	0
108	Stoml3	0	0.422924	0.43	0.001	0
109	Tctex1d4	0	0.40476	0.395	0.001	0
110	Tekt1	0	0.600148	0.561	0.001	0
111	Tekt4	0	0.294596	0.317	0.002	0
112	Tm4sf1	0	1.18679	0.846	0.108	0
113	Tmem107	0	1.00913	0.738	0.03	0
114	Tmem212	0	1.12191	0.762	0.001	0
115	Traf1	0	0.399356	0.392	0.002	0
116	Vim	0	0.957669	0.773	0.112	0
117	Vit	0	0.305302	0.308	0.001	0
118	Wdr78	0	0.28753	0.311	0.003	0
119	Egr1	1.97494e-301	1.36317	0.738	0.12	4.83979e-297
120	AC163616.2	4.9592e-291	1.08583	0.831	0.174	1.2153e-286
121	Pcp4l1	4.53479e-289	0.947643	0.759	0.123	1.11129e-284
122	Cyr61	5.51191e-287	0.909563	0.608	0.076	1.35075e-282
123	Bphl	5.22742e-280	0.600101	0.602	0.079	1.28103e-275
124	Btg2	2.91491e-272	1.43992	0.805	0.161	7.14329e-268
125	Rbp4	1.68881e-269	0.498762	0.235	0.01	4.1386e-265
126	Ly6h	1.24828e-263	0.675748	0.573	0.067	3.05903e-259
127	Ctxn1	1.4774e-246	0.481818	0.497	0.057	3.62052e-242
128	Ipo11	9.94624e-241	0.422076	0.471	0.054	2.43743e-236
129	Sox9	1.07244e-236	0.630803	0.517	0.064	2.62812e-232
130	Clu	2.84841e-236	0.731403	0.715	0.116	6.98031e-232
131	S100a10	1.2136e-234	0.283642	0.331	0.025	2.97404e-230
132	B9d1	2.86076e-229	0.444305	0.477	0.058	7.01057e-225
133	Elof1	6.60015e-218	1.2545	0.869	0.286	1.61743e-213
134	Dbi	1.87493e-216	3.15978	0.997	0.819	4.59471e-212
135	Spint2	2.53134e-208	0.303625	0.323	0.028	6.20329e-204
136	Maff	9.17986e-207	0.574536	0.346	0.033	2.24962e-202
137	Rbfox1	1.05345e-206	0.315689	0.34	0.031	2.58159e-202
138	Junb	4.26061e-206	1.77422	0.887	0.265	1.04411e-201
139	Jun	2.12774e-202	2.3953	0.945	0.443	5.21425e-198
140	Mllt1	1.76515e-200	0.255203	0.279	0.021	4.32567e-196
141	Mlc1	3.23107e-193	0.461977	0.526	0.074	7.91805e-189
142	Pacrg	3.80122e-189	0.276061	0.32	0.031	9.31527e-185
143	Lxn	6.34044e-188	0.478058	0.552	0.087	1.55379e-183
144	RP24-100B13.1	4.63499e-184	0.592972	0.596	0.121	1.13585e-179
145	Efcab2	4.84312e-184	0.273558	0.308	0.029	1.18685e-179
146	Tagln2	3.07227e-176	0.596341	0.66	0.139	7.5289e-172
147	Meg3	3.84956e-175	0.307531	0.706	0.148	9.43372e-171
148	Gsta4	1.11877e-170	0.434078	0.451	0.066	2.74166e-166
149	Itm2c	8.71556e-161	1.33813	0.924	0.484	2.13584e-156
150	Hmgn1	1.28622e-159	1.01029	0.858	0.343	3.152e-155
151	Ramp1	2.55334e-159	0.640454	0.744	0.17	6.25722e-155
152	Ccnd2	1.1608e-157	0.315896	0.363	0.046	2.84465e-153
153	Calm1	7.37713e-156	1.33534	0.991	0.86	1.80784e-151
154	Ift74	1.69683e-155	0.332019	0.372	0.05	4.15825e-151
155	Chchd6	1.31181e-154	0.405225	0.488	0.09	3.21472e-150
156	Zfp36	1.18348e-152	0.562279	0.471	0.082	2.90023e-148
157	Mt2	2.31246e-152	0.801181	0.695	0.17	5.66692e-148
158	Cetn2	9.70671e-152	0.620902	0.674	0.188	2.37873e-147
159	Itm2b	3.44574e-144	1.53455	0.985	0.856	8.44414e-140
160	Etfa	6.63241e-143	0.53213	0.578	0.135	1.62534e-138
161	Txn1	2.06275e-136	0.891371	0.837	0.375	5.05497e-132
162	Tmem47	1.93042e-134	0.254565	0.317	0.039	4.73069e-130
163	Ptn	1.20544e-131	-1.33665	0.061	0.797	2.95405e-127
164	Tmsb4x	2.95741e-131	-1.7533	0.898	0.969	7.24743e-127
165	Cnn3	5.57465e-130	0.862292	0.814	0.366	1.36612e-125
166	Zcchc18	5.27277e-129	0.349442	0.456	0.086	1.29214e-124
167	Lmo4	1.87076e-127	0.330972	0.404	0.068	4.58449e-123
168	Bace2	2.3554e-126	0.257403	0.314	0.044	5.77214e-122
169	Slc25a18	5.9261e-126	0.255668	0.39	0.06	1.45225e-121
170	Mt1	1.23691e-122	1.13052	0.98	0.671	3.03117e-118
171	Jund	4.72145e-122	1.34894	0.927	0.735	1.15704e-117
172	Cfap20	1.51564e-120	0.544475	0.61	0.177	3.71422e-116
173	Nr4a1	2.71385e-120	0.421694	0.317	0.046	6.65056e-116
174	RP23-256L12.2	1.01806e-117	0.581328	0.599	0.18	2.49485e-113
175	RP23-457I3.2	1.37502e-117	0.689778	0.703	0.272	3.36963e-113
176	Nudc	8.6614e-117	0.640588	0.68	0.247	2.12256e-112
177	Hsp90aa1	5.59661e-115	1.1241	0.907	0.666	1.37151e-110
178	Ccdc34	6.35734e-113	0.650081	0.654	0.238	1.55793e-108
179	Rabl2	2.81787e-111	0.281926	0.311	0.048	6.90548e-107
180	Anxa2	4.77462e-111	0.375841	0.404	0.077	1.17007e-106
181	Trp53bp2	5.58201e-110	0.574312	0.581	0.175	1.36793e-105
182	Gadd45g	6.96177e-108	0.67251	0.538	0.139	1.70605e-103
183	Tppp3	1.00808e-105	0.705636	0.776	0.319	2.4704e-101
184	AC163329.3	1.25251e-102	0.405419	0.584	0.159	3.0694e-98
185	Dnajc15	2.74882e-99	0.455476	0.584	0.189	6.73626e-95
186	Nim1k	2.91023e-98	0.454266	0.427	0.097	7.13181e-94
187	Zfp36l1	2.17006e-97	0.347329	0.419	0.09	5.31796e-93
188	S100a16	1.14368e-96	-0.948937	0.122	0.73	2.8027e-92
189	Car2	1.53719e-96	-1.76272	0.134	0.716	3.76704e-92
190	Fuom	3.52232e-95	0.272153	0.36	0.069	8.63181e-91
191	Csrp2	4.09068e-95	0.340651	0.477	0.11	1.00246e-90
192	Ssbp4	5.85158e-95	0.390851	0.5	0.129	1.43399e-90
193	Klf6	1.48911e-92	0.849766	0.587	0.208	3.64922e-88
194	Ift22	4.69229e-92	0.495407	0.535	0.172	1.14989e-87
195	Tuba1a	7.82704e-92	0.873666	0.991	0.829	1.9181e-87
196	Stmn2	9.69772e-92	0.318992	0.323	0.057	2.37652e-87
197	Smpdl3a	1.79484e-91	0.301349	0.378	0.079	4.39845e-87
198	Prdx6	3.77396e-91	0.76629	0.788	0.405	9.24847e-87
199	Cryab	3.43892e-88	-1.86049	0.206	0.71	8.42742e-84
200	Ntrk2	5.24437e-88	0.348743	0.512	0.134	1.28519e-83
